# Supplementary material for: Applications, indications, and effects of passive hydrotherapy WATSU (WaterShiatsu)—A systematic review and meta-analysis
Source: PLOS journal article supplement (doi:10.1371/journal.pone.0229705), 2020-03-13
Supplement: S7 (10.1371/journal.pone.0229705.s007) [file journal.pone.0229705.s007.pdf]

# Applications, Indications, and Effects of Passive Hydrotherapy WATSU

## References to studies

### Included studies

#### ***Antunes et al., 2016***

Antunes MD, Vertuan MP, Miquilin A, Leme DEdC, Morales RC, Oliveira DVd. Effects of Watsu on the quality of life and pain in elderly woman with fibromyalgia [Efeitos do Watsu na qualidade de vida e quadro doloroso de idosas com fibromialgia]. *Consciência e Saúde* 2016;15(4):636-641. [DOI: 10.5585/ConsSaude.v15n4.6756]

#### ***Barbosa et al., 2014***

Barbosa GAS, Rocha COM, Resende CMBMd, Sales KVdM. Effect of Watsu therapy on psychological aspects and quality of life of patients with temporomandibular disorder: case report [Efeito da terapia Watsu sobre os aspectos psicológicos e a qualidade de vida em pacientes com disfunções temporo-mandibulares: relato de caso]. *Revista Gaúcha de Odontologia* 2014;62(3):309-13. [DOI: 10.1590/1981-86372014000300000122409]

#### ***Borges & Parizotto, 2001***

Borges RM, Parizotto NA. Physiological analysis in stressed patients submitted to Watsu water therapy [Análise dos efeitos fisiológicos em pacientes com estresse submetidos à técnica Watsu]. *Fisioterapia Brasil* 2001;2(1):33-40. [Other: ISSN: 1518-9740]

#### ***Campos et al., 2018***

Campos NSd, Landim ACLP, Teixeira MP, Rodrigues JM, Grosskreutz TdS, Schrader EP. Aquatic relaxation and the control of occupational stress in workers of a university hospital [Relaxamento aquático no controle do estresse ocupacional em trabalhadoras de um hospital universitário]. In: *Revista Científica JOPEF*. Vol. 25. 2018. [Other: ISSN 1806-1508]

#### ***Chen et al., 2018***

Chen O, Grabarnick A, Pilz-Burstein R. The effect of Watsu treatments on pain indices and on the quality of sleep in women diagnosed as fibromyalgia patients. *Journal of the Israeli Physical Therapy Society (JIPTS)* 2018;20(2):14-24.

#### ***Chon et al., 2009***

Chon SC, Oh DW, Shim JH. Watsu approach for improving spasticity and ambulatory function in hemiparetic patients with stroke. *Physiotherapy Research International* 2009;14(2):128-36. [DOI: 10.1002/pri.421]

#### ***Chun et al., 2006***

Chun S-C, Yoon S-I, Oh D-W, Shim J-H, Lee G-W, An C-S. The effect of submerged relaxation exercise on muscle tone in persons with hemiparesis. *Physical Therapy Korea* 2006;13(3):84-91.

#### ***Cunha et al., 2010***

Cunha MGd, Carvaho EVd, Caromano FA. Effects of single session of Watsu [Efeitos da sessão única de WATSU]. *Cadernos de Pós-Graduação em Distúrbios do Desenvolvimento* 2010;10(1):103-9.

***Dornelas, 2011***

Dornelas LdF. Hydrotherapy techniques in a case of Jarcho-Levin [Técnicas de Hidroterapia em um caso de Jarcho-Levin]. *Revista Neurociencia* 2011;19(1):85-9.

***Faull, 2005***

Faull K. A pilot study of the comparative effectiveness of two water-based treatments for fibromyalgia syndrome: Watsu and Air massage. *Journal of Bodywork & Movement Therapies* 2005;9(3):202-10. [DOI: 10.1016/j.jbmt.2004.12.001]

***Gimenes et al., 2006***

Gimenes OR, Santos EC, Silva TJPV. Watsu in the treatment of fibromyalgia: pilot study [Watsu no Tratamento da Fibromialgia: Estudo Piloto]. *Revista Brasileira de Reumatologia* 2006;46(1):75-6.

***Gimenez & Castro, 2018***

Gimenez MdF, Castro NHSd. Effect of watsu technique on the quality of sleep and spasticity in teenagers with cerebral paralysis: Case series [Efeito da técnica de watsu na qualidade do sono e espasticidade em adolescentes com paralisia cerebral: Série de casos]. *Unisantia Health Science* 2018;2(1):42-50.

***Hora et al., 2017***

Hora CRB, Santos LdS, Lima MIdS, Gusmão TMRd, Ribeiro ASC. Physiological variations and subjective feelings of disciplines from the tiradentes - al university center submitted to a single watsu session [Variações fisiológicas e sensaçõessubjetivas de discentes, do centro universitário tiradentes - al, submetidos a uma única sessão de watsu]. *Ciências Biológicas e de Saúde Unit | Aracaju* 2017;4(1):31-42. [Other: ISSN ELETRÔNICO 2316-3143]

***Israel et al., 2006***

Israel VL, Arruda ES, Paolini AP, Barbosa AD, Shmeil A, Flach CRC. Physical Therapy: Principles of the WATSU in Patients with Ankylosing Spondylitis. In: Karagülle MZ, Dönmez A, editor(s). 35th Congress of the International Society of Medical Hydrology & Climatology. Istanbul, 2006.

***Jithin & Adarsh, 2019***

Jithin TA, Adarsh M. Effect of watsu water relaxation training on selected physiological variables among school level swimmers. *International Journal of Scientific Research* 2019;8(8):35-36. [Other: PRINT ISSN No. 2277 - 8179]

***Lima et al., 2009***

Lima AARd, Pereira KdS, Vinhas R. Effect of the Watsu method in moderate asthmatic patient - case report [Efeitos do método Watsu em paciente asmático moderado - relato de caso]. *Revista Neurociencias* 2009;17(3):283-6.

***Mota et al., 2007***

Mota NM, Silva VH, Lima JS, Oliveira LVF. Study of autonomic nervous activity by analysis of variability of cardiac frequency in subjects submitted to WATSU therapy [Estudo da Atividade Nervosa Autônômica por Meio daAnálise da Variabilidade da Frequência Cardíaca emSujeitos Submetidos à Terapia Watsu]. *Revista UniVap* 2006;14(26):1343-1346.

***Nakamoto, 2016***

Nakamoto BV. Watsu® therapy efficacy as a guide for prevention of elderly falls: A case study [A eficácia da terapia de watsu® como indicação para prevenção de quedas a idosos: Um estudo de caso]. In: *II Brazilian*

and International Congress of Aquatic Physiotherapy - ABFA. Sao Caetano do Sul - SP - Brazil, 2016.

### ***Pastrello et al., 2009***

Pastrello FHH, Garcão DC, Pereira K. Watsu method as complementary resort in the physiotherapy treatment of spastic cerebral palsy tetraparetic: study of the case [Método Watsu como recurso complementar no tratamento fisioterapêutico de uma criança com paralisia cerebral tetraparética espástica: estudo de caso]. *Fisioterapia em Movimento* 2009;22(1):95-102. [Other: ISSN 0103-5150]

### ***Pinkalsky et al., 2011***

Pinkalsky A, Thuler PAT, Brech GC, Cunha MCB. The benefits of Watsu in the treatment of chronic pain and quality of life of patients with fibromyalgia [Os benefícios do Watsu no tratamento da dor crônica e qualidade de vida de pacientes fi bromiálgicos]. *Fisioterapia Brasil* 2011;12(1):4-8. [Other: ISSN 1518-9740]

### ***Rambo & Filippin, 2019***

Rambo DC, Filippin NT. Effects of aquatic physical therapy in preterm infants admitted to the neonatal intensive care unit [Efeitos da fisioterapia aquática em prematuros internados na unidade de terapia intensiva neonatal]. In: 6. Congresso internacional em saúde. Ijuí, Rio Grande do Sul, Brasil.

### ***Ramirez et al., 2019***

Ramírez NP, Cares PN, Peñailillo PSM. Effectiveness of watsu therapy in patients with juvenile idiopathic arthritis. A parallel, randomized, controlled and single-blind clinical trial [Efectividad de la terapia watsu en pacientes con artritis idiopática juvenil. Un ensayo clínico controlado paralelo, aleatorio y simple ciego]. *Revista Chilena de Pediatría* 2019;90(3):283-292. [DOI: 10.32641/rchped.v90i3.886]

### ***Ribeiro et al., 2019***

Ribeiro IR, Lima FLC, Rosa TB, Santos RM, Costa SAF, Souza DM, Dias GAS, Santos CAS. The effects of the watsu method on functional capacity, anxiety and depression in patients with parkinson disease. *Archives in Biosciences & Health* 2019;1(1):113-124.

### ***Schitter & Fleckenstein, 2018***

Schitter AM, Fleckenstein J. Passive Hydrotherapy WATSU® for Rehabilitation of an Accident Survivor: A Prospective Case Report. *Complementary Medicine Research* 2018;25(4):263-268. [Other: 10.1159/000487768]

### ***Schitter et al., 2015***

Schitter AM, Nedeljkovic M, Baur H, Fleckenstein J, Raio L. Effects of passive hydrotherapy WATSU (WaterShiatsu) in the third trimester of pregnancy: Results of a controlled pilot study. *Evidence-based complementary and alternative medicine: eCAM* 2015;1-10. [DOI: 10.1155/2015/437650]

### ***Tufekcioglu et al., 2018***

Tufekcioglu E, Erzeybek MS, Kaya T, Ozan G. The Effect of 12-Week Passive Aquatic Bodywork on Sympathovagal Balance of Obese Youth. *Journal of Education and Training Studies* 2018;6(2):166-176. [DOI: 10.11114/jets.v6i2.2963]

### ***Wieser, 2007***

Wieser A. WATSU for children with severe and profound disabilities. *Aquatic Therapy Journal* 2007;9(2):9-13.
