# Supplementary material for: Applications, indications, and effects of passive hydrotherapy WATSU (WaterShiatsu)—A systematic review and meta-analysis
Source: PLOS journal article supplement (doi:10.1371/journal.pone.0229705), 2020-03-13
Supplement: S9 (10.1371/journal.pone.0229705.s009) [file journal.pone.0229705.s009.pdf]

# Applications, Indications, and Effects of Passive Hydrotherapy WATSU

## References to studies

### Excluded studies

#### ***Araújo & Assis, 2018x***

Araújo DS, Assis SCd. Effects of aquatic physiotherapy in the treatment of amyotrophic lateral sclerosis [Efeitos da fisioterapia aquática no tratamento da esclerose lateral amiotrófica]. *Fisioterapia Brasil* 2018;19(5):170-175.

#### ***Becker & Lynch, 2017x***

Becker BE, Lynch S. Case Report: Aquatic Therapy and End-Stage Dementia. *PM R* Sept 14 2017;XXX:1-5. [DOI: 10.1016/j.pmrj.2017.09.001]

#### ***Bonetti et al., 2010x***

Bonetti A, Cantos GA, Frutuoso JT, Rocha ME. Interdisciplinary and Multiprofessional Activities Cardiovascular Diseases Prevention Program Experience Report [Atividades interdisciplinares e multiprofissionais: relatos de experiência com participantes do programa de prevenção para doenças cardiovasculares Extensio: Revista Eletrônica de Extensão]. *Revista Eletrônica de Extensão* 2010;7(10):70-89.

#### ***Cantos & Souza, 2013x***

Cantos GA, Souza LC. Follow Up of Two Diabetic Patients by Interdisciplinary and Multiprofessional Team [Acompanhamento de dois pacientes diabéticos por equipe interdisciplinar e multiprofissional]. *Extensio: Revista Eletrônica de Extensão* 2013;9(14):81-91. [DOI: 10.5007/1807-0221.2012v9n14p81]

#### ***Cantos et al., 2008x***

Cantos GA, Schütz R, Rocha ME. Association of the Techniques of Watsu and Halliwick with the Aquatic Biodanza, as Form to Improve the Psychological Stress of Patients with Chronic Diseases [Associação das técnicas de Watsu e Halliwick com a Biodanza® aquática, como forma de melhorar o estresse psicológico de pacientes com doenças crônicas]. *Revista Pensamento Biocêntrico* 2008;9(Jan/Jun):69-83.

#### ***Cantos et al., 2008xa***

Cantos GA, Schütz R, Rocha ME, Marques CdSdS, Balén MdGW, Hermes E. Association of Methods Watsu, Halliwick, and Biodança: Preliminary Data of a Population with Chronic Diseases [O método watsu e halliwick associados com a biodança: dados preliminares de uma população com doenças crônicas]. *Pensamento Biocêntrico* 2008;10(Jul/Dec):27-41.

#### ***Cantos et al., 2013x***

Cantos GA, Corrêa TA, Bonetti A, Wommer D. Contribution of a Body Practices Recreational in the Prevention of Cardiovascular Disease [Contribuição de um programa de práticas corporais lúdicas na prevenção de doenças cardiovasculares]. *Extensio: Revista Eletrônica de Extensão* 2012;9(14):73-80. [DOI: 10.5007/1807-0221.2012v9n14p73]

#### ***Chang et al., 2009x***

Chang KH, Ryu JK, Jung YJ. Validation of the Effect of Aquatic Exercise Program Designed to Improve Motor Function of Hemiplegic Patients. *Journal of Adapted Physical Activity* 2009;17(4):19-34.

**Costa et al., 2017x**

Costa MRDVd, Lima RCd, Lopes CP, Shirahige L, Albuquerque PL. Effects of hydrotherapy on the endurance and quality of life instroke survivors [Efeito da hidroterapia no condicionamento cardiovascular e na qualidade de vida de pacientes após acidente vascular encefálico]. *ConScientiae Saúde* 2017;16(2):259-265. [DOI: 10.5585/ConsSaude.v16n2.6936]

**Degani & Villa, 2005x**

Degani AM, Villa PdS. Range of Movement and Health Related Quality of Life in Patients with Juvenile Idiopathic Arthritis Submitted to Aquatic Physical Therapy [Amplitude de Movimento Articular e Qualidade de Vida Relacionada à Saúde de Portador de Artrite Idiopática Juvenil Submetido à Fisioterapia Aquática]. *Fisioterapia em Movimento* 2005;18(4):33-42.

**Elsner et al., 2009x**

Elsner VR, Trentin RP, Horn CC. The Effects of Hydrotherapy in the Quality of Life of Women Undergoing Mastectomy [Efeito da hidroterapia na qualidade de vida de mulheres mastectomizadas]. *Arquivos de Ciências da Saúde* 2009;16(2):67-71.

**Eo & Lee, 2011x**

Eo S-J, Lee E-H. Effect of Water Exercise on Fitness Factor and Delivery in Pregnant Women. *The Korean Journal of Sport* 2011;9(3):571-578.

**Ferreira & Matsutani, 2006x**

Ferreira KB, Matsutani LA. Hydrotherapy approach in the treatment of fibromyalgia [Abordagem da hidroterapia no tratamento da fibromialgia]. *Revista PIBIC (Programa Institucional de Bolsas de Iniciação Científica)* 2006;3(2):39-47.

**Gimenes et al., 2007x**

Gimenes RO, Previato BL, Claudio PDS, Santos ECd. Repercussion of a hydrokinesiotherapy program in the life and pain satisfaction of patients with herniated disc [Repercussão de um programa de hidrocinesioterapia na satisfação de vida e dor de pacientes com hérnia de disco]. In: *Congresso Internacional de Postura - I Edição - 2007*. Rio de Janeiro, Brasil, 2007. [Other: ISSN 2359-411X]

**Gimenes et al., 2008x**

Gimenes RO, Carvalho NTPd, Farelli BC, Mello TWPd. Impact of Aquatic Physiotherapy on Arterial Pressure of Aged People [Impacto da fisioterapia aquática na pressão arterial de idosos]. *Õ Mundo da Saúde* 2008;32(2):170-75.

**Gimenes et al., 2008xa**

Gimenes RO, Previato BL, Claudio PDS, Santos ECd. Impact of the spinal school program on individuals with lumbar disc herniation [Impacto do programa escola de coluna em indivíduos com hérnia de disco lombar]. *Revista Dor* 2008;9(2):1234-1241.

**Gonçalves et al., 2009x**

Gonçalves PV, Santos WC, Peternella FMN. Assessment of an aquatic therapy program in treatment of thoracic ravine syndrome: case report [Avaliação de um programa de terapia aquática no tratamento da síndrome do desfiladeiro torácico: relato de caso]. *Revista UNINGÁ, Maringá* 2008;20:161-170.

**Jacinto et al., 2008x**

Jacinto RLM, Galvão LLLF, Araújo AGR, Andrade SCd. Evaluation of the Life Quality of Women with Fibromyalgia After Aquatic Physical Therapy [Avaliação da qualidade de vida em mulheres com fibromialgia após fisioterapia aquática]. Revista da FARN (Faculdade Natalense para o Desenvolvimento do Rio Grande do Norte) 2008;7(1):13-27.

**Jakaitis & Guazelli, 2005x**

Jakaitis F, Guazelli ABA. Study of the effect motor-sensories of the aquatic therapy with patients in vigil coma stage [Estudo dos efeitos sensorio-motores da fisioterapia aquática com pacientes em estado de coma vigil]. Revista Neurociências 2005;13(4):215-18.

**Kakihara & Neves, 2005x**

Kakihara CT, Neves CG. Functional assessment of neurological patients with stroke, before and after physical therapy and hydrotherapy [Avaliação do grau de funcionalidade de pacientes que sofreram acidente vascular encefálico antes e após intervenção fisioterapêutica no solo e na hidroterapia]. Fisioterapia Brasil 2005;6(5):332-338.

**Kim & Lee, 2015x**

Kim BO, Lee HJ. Effects of Aquatic Exercise Therapy on Motor Function and Balance in Children with Spastic Cerebral Palsy. Journal of Special Education & Rehabilitation Science 2015;54(1):75-94.

**Kim et al., 2009x**

Kim MG, Hong YJ, Koo KS. The Effects on the Gross Motor Skills of the Children with Hemiplegia by Aquatic Rehabilitation Exercise. Korean Society for Developmental Biology 2009;17(2):99-108.

**Kwangmin et al., 2016x**

Kwangmin R, Asif A, Minji K, Changyoung L, Yujin K, Gyusung L, Jingu K. Effects of assisted aquatic movement and horseback riding therapies on emotion and brain activation in patients with cerebral palsy. The Journal of Physical Therapy Science 2016;28:3283-3287.

**Lee & Kim, 2015x**

Lee CY, Kim CH. The Effects of Water Rehabilitation Exercise on Emotion of Children with Encephalopathy: A Study Using Electroencephalography. The Korean Journal of Growth and Development 2015;23(2):171-79.

**Lotan & Barmatz, 2009x**

Lotan M, Barmatz C. Hydrotherapy for a young child with Rett syndrome. Review of the literature and a case study. International Journal on Disability and Human Development 2009;8(3):349-57.

**Maczkowiak et al., 2007x**

Maczkowiak S, Hölter G, Otten H. WATSU - on the effectiveness of differently accentuated movement-therapeutic interventions in clinically depressed patients [WATSU - Zur Wirksamkeit unterschiedlich akzentuierter bewegungstherapeutischer Interventionen bei klinisch depressiven Patienten]. Bewegungstherapie und Gesundheitssport 2007;23:58-64.

**Martins et al., 2015x**

Martins LG, Rocha LPB, Veríssimo TCRA, Souza JdS, Prudente COM, Ribeiro MFM. Effects of Virtual Rehabilitation, Bobath Concept, and Aquatic Therapy in Children with Cerebral Palsy [Efeitos da reabilitação virtual, conceito Bobath e terapia aquática em crianças com paralisia cerebral]. Revista Neurociência 2015;23(1):68-73. [DOI: 10.4181/RNC.2015.23.01.975.6p]

***Masselli et al., 2009x***

Masselli MR, Casoti A, Campos ACLd, Flores ALdM, Campos JI, Silvestre MR. Hydrotherapy for treating work related musculoskeletal disorder [Hidroterapia no tratamento de pacientes com distúrbios osteomusculares relacionados ao trabalho]. *Revista da Sociedade Brasileira para o Estudo da Dor* 2009;10(4):307-12.

***Mazetto & Navarro, 2007x***

Mazetto AA, Navarro FM. Benefit of the aquatic therapy in the arthritisrheumatoid: study of case [Benefício da terapia aquática na artrite reumatóide: estudo de caso]. *Revista Uningá* 2007;12:153-159.

***Melo et al., 2012x***

Melo FR, Alves DAG, Leite JMRS. Benefits of hydrotherapy for spasticity in children with hydrocephalus [Benefícios da Hidroterapia para Espasticidade em Uma Criança com Hidrocefalia]. *Revista Neurociências* 2012;20(3):415-21. [DOI: 10.4181/RNC.2012.20.707.7p]

***Mesquita et al., 2007x***

Mesquita MG, Caetano L, Pernambuco CS, Silva EB, Dantas EHM. Urinary excretion of hydroxyproline analysis and pain in subjects with low back pain after stretching in hydrotherapy [Análise da excreção urinária de hidroxiprolina e do nível de dor em sujeitos com lombalgia após alongamento na hidrocinesioterapia]. *Fisioterapia Brasil* 2007;8(2):99-102.

***Nascimento et al., 2012x***

Nascimento VLdS, Borba GdS, Leite CMdB, Garabini MC. Hydrotherapy Protocol In Guillain Barre's Syndrome - Case Report [Protocolo Hidroterápico na Síndrome de Guillain-Barré- Estudo de Caso]. *Revista Neurociências* 2012;20(3):392-8.

***Navarro et al., 2006x***

Navarro FM, Neto JOC, Benossi TG. The Effect Water Therapy in the Fibromyalgic Patients' Quality Life: Related of Case [Efeitos da terapia aquática na qualidade de vida de pacientes fibromiálgicos - estudo de caso]. *Arquivos de Ciências da Saúde* 2006;10(2):93-7.

***Navarro et al., 2006xa***

Navarro FM, Sato CT, Melo LCD. Hydrotherapy in the treatment of stroke: a case study [Hidroterapia no tratamento do acidente vascular cerebral: estudo de caso]. *Revista Uningá* 2006;7:151-156.

***Nogueira et al., 2017x***

Nogueira ER, Silva EPDC, Navarro FM, Tako KV. Effects of hydrotherapy on brachial plexus and accessory nerve injury: Case study [Efeitos da hidroterapia na lesão de plexo braquial e nervo acessório: Estudo de caso]. *Revista Uningá* 2017;8(1):109-118.

***Oh et al., 2015x***

Oh SJ, Yeom J-W, Kim M, Lee M, Yoon BC. Aquomanual Therapy Program Development for Workers with Chronic Musculoskeletal Disorders. *Journal of Yoga & Physical Therapy* 2015;5(4):1. [DOI: <http://dx.doi.org/10.4172/2157-7595.1000212>]

***Orsini et al., 2009x***

Orsini M, Mello MP, Calheiros M, Nascimento OJM, Freitas MRGd. Hydrotherapy for spasticity in Strumpell-Lorrain disease: case report [Hidroterapia para espasticidade na doença de Strumpell-Lorrain: relato de caso]. *Revista Neurociencia* 2009;17(1):67-71.

***Park et al., 2015x***

Park B-S, Noh J-W, Kim M-Y, Lee L-K, Yang S-M, Lee W-D, Shin Y-S, Kim J-H, Lee J-U, Kwak T-Y, Lee T-H, Kim J-Y, Park J, Kim J. The effects of aquatic trunk exercise on gait and muscle activity in stroke patients: a randomized controlled pilot study. *Journal of physical therapy science* 2015;27(11):3549.

***Park et al., 2016x***

Park B-S, Noh J-W, Kim M-Y, Lee L-K, Yang S-M, Lee W-D, Shin Y-S, Kim J-H, Lee J-U, Kwak T-Y, Lee T-H, Park J, Kim J. A comparative study of the effects of trunk exercise program in aquatic and land-based therapy on gait in hemiplegic stroke patients. *The Journal of Physical Therapy Science* 2016;28:1904-8.

***Pattman et al., 2013x***

Pattman J, Hall J, Record E. Effectiveness of Aquatic Physiotherapy in Clinical Practice. *International Journal of Aquatic Research and Education* 2013;7:396-406.

***Romeiro & Navarro, 2011x***

Romeiro TC, Navarro FM. Aquatic therapy in the Guillain-Barré Syndrome: case study [Terapia aquática na síndrome de Guillain-Barré: estudo de caso]. *Revista UNINGÁ, Maringá* 2011;29:121-129.

***Santana et al., 2005x***

Santana JMd, Filho VJdS, Almeida RDd. Hydrokinesiotherapeutic Approach for Bearers of Severe Transverse Myelitis [Abordagem hidrocinesioterapêutica para portadores de mielite transversa grave]. *Revista HISPECI & LEMA* 2005;8:77-80.

***Santos & Facci, 2009x***

Santos STd, Facci LM. Aquatic Exercise Therapy in Fibromyalgia: Serie of Cases [Hidrocinesioterapia na Fibromialgia: Série de Casos]. *Revista Saúde e Pesquisa* 2009;2(3):427-32.

***Santos et al., 2018x***

Santos SBd, Oliveira Santos Md, Ferreira LL. Influence of aquatic physiotherapy on the functional capacity and quality of life of hypertensive elderly [Influência da fisioterapia aquática na capacidade funcional e qualidade de vida de idosos hipertensos]. *Revista Interdisciplinar De Promoção Da Saúde* 2018;1(1):7-13. [DOI: <http://dx.doi.org/10.17058/rips.v1i1.11940>]

***Silva & Navarro, 2006x***

Silva EPDC, Navarro FM. Repercussion of hydrotherapy in atrophy oligopontocerebellar: report of a case [Repercussão da hidroterapia na atrofia oligopontocerebelar: relato de um caso]. *Revista Uningá* 2006;9:119-125.

***Silva et al., 2006x***

Silva TJPV, Telles GCQ, Gimenes RO, Trimer R. Hydrotherapy and cardiovascular rehabilitation: A new approach on late post-operative rehabilitation after bariatric surgery [Hidroterapia e reabilitação cardiovascular: Uma nova abordagem no pós-operatório tardio de cirurgia bariátrica]. *O mundo da Saúde São Paulo* 2006;30(1):179-184.

***Smeeding & Osguthorpe, 2005x***

Smeeding S, Osguthorpe S. The Development of an Integrative Healthcare Model in the Salt Lake City Veterans Affairs Healthcare System. *Alternative Therapies in Health and Medicine* 2005;11(6):46-51.

***Smeeding et al., 2010x***

Smeeding SJW, Bradshaw DH, Kumpfer K, Trevithick S, Stoddard GJ. Outcome Evaluation of the Veterans Affairs Salt Lake City Integrative Health Clinic for Chronic Pain and Stress-Related Depression, Anxiety, and Post-Traumatic Stress Disorder. *The Journal of Alternative and Complementary Medicine* 2010;16(8):823-835. [DOI: 10.1089/acm.2009.0510]

***Smeeding et al., 2011x***

Smeeding S, Bradshaw DH, Kumpfer KL, Trevithick S, Stoddard GJ. Outcome evaluation of the Veterans Affairs Salt Lake City Integrative Health Clinic for chronic nonmalignant pain. *The Clinical Journal of Pain* 2011;27(2):146-55.

***Taketa et al., 2018x***

Taketa PS, Landim ACLP, Teixeira MP, Cardoso JR, Moreira ECH, Facci LM. Effects of aquatic physiotherapy in a patient with youth ankylosing spondylitis: Case report [Efeitos da fisioterapia aquática em um paciente com espondilite anquilosante juvenil: Relato de caso]. In: *Fórum Internacional de Qualidade de Vida e Saúde Curitiba: Revista Científica JOPEF*. Vol. 1. 2018.

***Tanoue et al., 2009x***

Tanoue MB, Reis PCd, Peternella FMN. The hydrotherapy as physiotherapeutic conduct in treatment of fibromyalgia: case report [A hidroterapia como conduta fisioterapêutica no tratamento da fibromialgia: relato de caso]. *Revista Uninga* 2009;19:161-171.

***Tonieto et al., 2015x***

Tonieto M, Rama P, Schuster RC, Renosto A. Effects of an Aquatic Physical Therapy Intervention in Patients After Stroke [Efeitos de uma intervenção de fisioterapia aquática em pacientes pós-acidente vascular cerebral]. *Revista de Atenção à Saúde* 2015;13(45):5-12. [DOI: 10.13037/rbcs.vol13n45.2838]

***Tüfekçioğlu 2009x***

Tüfekçioğlu E, Çotuk HB. Comparison of Heart Rate Variability in Different Body Positions on Land and in Water [Suda ve karada farklı beden konumlarında kalp hızı değişkenliğinin karşılaştırılması]. *Nigde University Journal of Physical Education and Sport Sciences* 2009;3(3):152-9.

***Useros-Olmo & Collado-Vázquez, 2010x***

Useros-Olmo AI, Collado-Vázquez S. Effects of an hydrotherapy program in the treatment of cervical dystonia. A pilot study [Efectos de un programa de hidroterapia en el tratamiento de la distonía cervical. Estudio piloto]. *Revista de Neurología* 2010;51(11):669-76.

***Useros-Olmo et al., 2018x***

Useros-Olmo AI, Martinez-Pernia D, Huepe D. The effects of a relaxation program featuring aquatic therapy and autogenic training among people with cervical dystonia (a pilot study). *Physiother Theory Pract* 2018;1-10. [DOI: 10.1080/09593985.2018.1488319]

***Vogtle et al., 1998x***

Vogtle LK, Morris DM, Denton BG. An aquatic program for adults with cerebral palsy living in group homes. *Physical Therapy Case Reports* 1998;1(5):250-259.

**Zanella 2011x**

Zanella J, Romero CH. Quality of Life in Patients With Spinal Chord Injury Submitted to Neurofunctional Physiotherapy and Aquatic Physiotherapy [Qualidade de vida em pacientes com lesão medular submetidos a fisioterapia neurofuncional e fisioterapia aquática]. FIEP Bulletin Online, Special Edition 2011;81(2).
