# Supplementary material for: Applications, indications, and effects of passive hydrotherapy WATSU (WaterShiatsu)—A systematic review and meta-analysis
Source: PLOS journal article supplement (doi:10.1371/journal.pone.0229705), 2020-03-13
Supplement: S10 (10.1371/journal.pone.0229705.s010) [file journal.pone.0229705.s010.pdf]

## DATABASES (2018, without updates)

| retrieval with filters                                | Provider      | Database | retrieval without filters                                                             |
|-------------------------------------------------------|---------------|----------|---------------------------------------------------------------------------------------|
|                                                       | 1             | 1        | 0 World Health Organization's International Clinical Trials Registry Platform (ICTRP) |
|                                                       | 1             | 1        | 0 Cochrane Central Register of Controlled Trials (CENTRAL)                            |
|                                                       | 1             | 1        | 0 EU Clinical Trials Register                                                         |
|                                                       | 1             | 1        | 0 U.S. National Institutes of Health's Clinical Trials Register                       |
|                                                       | 1             | 1        | 0 German Clinical Trials Register                                                     |
|                                                       |               |          | includes:                                                                             |
|                                                       |               |          | • LWW (Lippincott Williams & Wilkins): 0,                                             |
|                                                       |               |          | • PsycARTICLES: 0,                                                                    |
|                                                       |               | Ovid     | • Embase 10,                                                                          |
|                                                       |               |          | • MEDLINE: 4,                                                                         |
|                                                       |               |          | • Books@Ovid: 1,                                                                      |
|                                                       |               |          | • Journals@ovid: 2                                                                    |
|                                                       | 1             | 6        | 19                                                                                    |
|                                                       | 1             | 1        | 360 Swissbib (redundant)                                                              |
|                                                       | 1             | 1        | 43 Science direct                                                                     |
| 17 embase                                             | 1             | 1        | 17 Embase                                                                             |
|                                                       |               |          | includes:                                                                             |
|                                                       |               |          | • CINAHL: 19 Results                                                                  |
|                                                       |               |          | • SocINDEX: 0                                                                         |
|                                                       |               |          | • SPORTDiscus with Full Text: 30 Results                                              |
|                                                       |               |          | • Business Source Premier: 16 Results                                                 |
|                                                       |               |          | • Regional Business News: 8 Results                                                   |
|                                                       |               |          | • MEDLINE: 5 Results                                                                  |
|                                                       |               |          | • RILM Abstracts of Music Literature (1967 to Present only): 1 R                      |
|                                                       |               |          | • International Bibliography of Theatre & Dance with Full Text: 2 R                   |
|                                                       |               |          | • Dentistry & Oral Sciences Source: 4 Results                                         |
|                                                       |               |          | • Avery Index to Architectural Periodicals: 1 Result                                  |
| 86 EBSCO                                              | 1             | 5        | 86 EBSCO                                                                              |
| 12 waba                                               | 1             | 1        | 12 waba                                                                               |
|                                                       |               |          | includes:                                                                             |
|                                                       |               |          | • Web of Science TM Core Collection: 2 Results                                        |
|                                                       |               |          | • KCI-Korean Journal Database: 3 Results                                              |
|                                                       |               |          | • SciELO Citation Index: 2 Results                                                    |
|                                                       |               |          | • MEDLINE: 5 Results                                                                  |
| 12 Web of Science                                     | 1             | 4        | 12 Web of Science                                                                     |
| 19 CINAHL                                             | 1             | 1        | 19 CINAHL                                                                             |
| 12 Livio                                              | 1             | 1        | 12 Livivo/Medpilot                                                                    |
| 1 Pedro                                               | 1             | 1        | 1 Pedro                                                                               |
| 1 Cochrane                                            | 1             | 1        | 1 Cochrane Library                                                                    |
|                                                       |               |          | includes:                                                                             |
|                                                       |               |          | • ProQuest Dissertations & Theses Global: 49                                          |
|                                                       |               |          | • British Periodicals: 13                                                             |
|                                                       |               |          | • Periodicals Archive Online: 5                                                       |
|                                                       |               |          | • American Periodicals: 13                                                            |
|                                                       |               |          | • Periodicals Index Online: 3                                                         |
| 83 ProQuest                                           | 1             | 1        | 83 ProQuest                                                                           |
| 14 Pubmed                                             | 1             | 1        | 14 Pubmed                                                                             |
| 26 Researchgate                                       | 1             | 1        | 26 Researchgate                                                                       |
| 13 alt: GS "wasser shiatsu"                           | 1             | 1        | 16 GS "wasser shiatsu"                                                                |
| 23 alt: GS wassershiatsu                              |               |          | 28 GS wassershiatsu                                                                   |
| 800 alt: GS WATSU OR "water shiatsu" OR watershiatsu" |               |          | 110 GS "water shiatsu"                                                                |
|                                                       |               |          | 120 GS watershiatsu                                                                   |
|                                                       |               |          | 1000 GS watsu (of approximately 1'170)                                                |
| 1119 merged                                           | EndNote "old" | 20       | 32 1979 merged                                                                        |
|                                                       |               |          | EndNote "new"                                                                         |
