# Supplementary material for: Applications, indications, and effects of passive hydrotherapy WATSU (WaterShiatsu)—A systematic review and meta-analysis
Source: PLOS journal article supplement (doi:10.1371/journal.pone.0229705), 2020-03-13
Supplement: S12 (10.1371/journal.pone.0229705.s012) [file journal.pone.0229705.s012.pdf]

## Study Flow

| RETRIEVAL                                                | total        | in    | out |
|----------------------------------------------------------|--------------|-------|-----|
| retrieval with filters                                   |              | 1'119 |     |
| retrieval without filters                                |              | 1'979 |     |
|                                                          | <u>3'098</u> |       |     |
| alert 1 = alert 1 add (additional sources)               |              |       |     |
| alert 2                                                  |              | 60    |     |
| alert 3                                                  |              | 27    |     |
| alert 4                                                  |              | 6     |     |
| alert 5                                                  |              | 28    |     |
| alert 6 (last search in Google Scholar 3.10.2019)        |              | 246   |     |
| alert 7 (last search in all databases 3.10.2019)         |              | 293   |     |
|                                                          | <u>660</u>   |       |     |
| all Databases                                            | <u>3'758</u> |       |     |
| additional items (institutes, handsearch "alert 1 add")  |              | 77    |     |
| additional items (institutes, researchers "alert 6 add") |              | 13    |     |
| additional items total                                   | <u>90</u>    |       |     |
| <b>TOTALLY RETRIEVED</b>                                 | <b>3'848</b> |       |     |

| SCREENINGS                                  |              |              |                          |
|---------------------------------------------|--------------|--------------|--------------------------|
| 1. Rnd screening, no duplicates             | 1'235        | <u>738</u>   | -497                     |
| 2. Rnd general                              | 738          | 715          | -23                      |
| 2. Rnd alert 1 add                          | 77           | 77           | 0                        |
| 2. Rnd alert 2                              | 60           | 17           | -43                      |
| 2. Rnd alert 3                              | 27           | 17           | -10                      |
| 2. Rnd alert 4                              | 6            | 4            | -2                       |
| 2. Rnd alert 5                              | 28           | 22           | -6                       |
| 2. Rnd alert 6 incl. Add                    | 259          | 141          | -118                     |
| 2. Rnd alert 7 without duplicates           | 214          | 28           | -186                     |
|                                             | <u>1'409</u> | <u>1'021</u> | <u>-388</u>              |
| <b>TOTALLY SCREENED, without duplicates</b> | <b>1'906</b> |              | <b>-885 Screened out</b> |

**SCREENED IN (=assessed) 1'021**

### ASSESSMENT and DATA EXTRACTION

14 no full text

357 excluded during assessment  
 31 excluded during extraction  
 duplicates, not concerning  
**388 WATSU, or only in itemization**

131 Miscellaneous (e.g. magazine articles)  
 38 Conference proceedings  
 156 Theses  
 99 Books / chapters  
**424 Grey literature**

109 Secondary peer  
 59 Primary peer (WATSU only minor part)  
 27 Primary peer RoB  
**195 peer reviewed**

**Included, evaluated for risk of bias 27**

**994 excluded**
